# Supplementary material for: π⋯π interaction directed 2D FeNi-LDH nanosheets from 2D Hofmann-MOFs for the oxygen evolution reaction
Source: Royal Society of Chemistry journal article supplement (doi:10.1039/d1ta09921c), 2021-12-14
Supplement: d1ta09921c1.pdf [file d1ta09921c1.pdf]

## Electronic Supplementary Information

$\pi\cdots\pi$  interaction directed 2D FeNi-LDHs nanosheets from 2D Hofmann-MOFs for oxygen evolution reaction

Jia-Min Huo,<sup>a</sup> Ying Wang,<sup>a\*</sup>, Jie Meng,<sup>a</sup> Xin-Yi Zhao,<sup>a</sup> Quan-Guo Zhai,<sup>a</sup> Yu-Cheng Jiang,<sup>a</sup> Man-Cheng Hu,<sup>a</sup> Shu-Ni Li,<sup>a\*</sup> and Yu Chen<sup>b</sup>

<sup>a</sup>Key Laboratory of Macromolecular Science of Shaanxi Province, School of Chemistry & Chemical Engineering, Shaanxi Normal University, Xi'an, Shaanxi, 710062, China

<sup>b</sup> School of Materials Science and Engineering, Shaanxi Normal University, Xi'an 710062, PR China

\*Corresponding author

Email: lishuni@snnu.edu.cn; wangyingyoyo@snnu.edu.cn

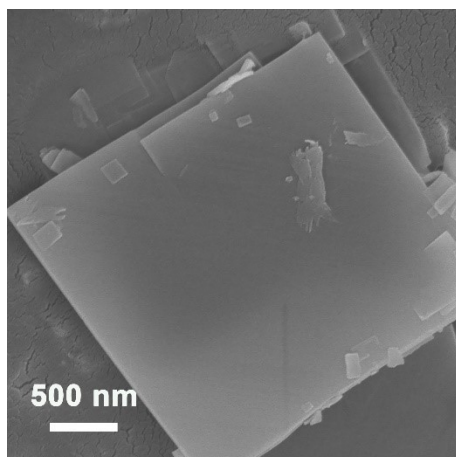

**Figure S1.** SEM image of FeNi-py-MOF precursor.

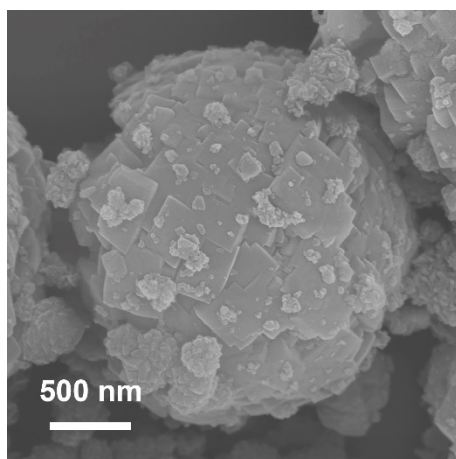

**Figure S2.** SEM image of FeNi-ISOQ-MOF precursor.

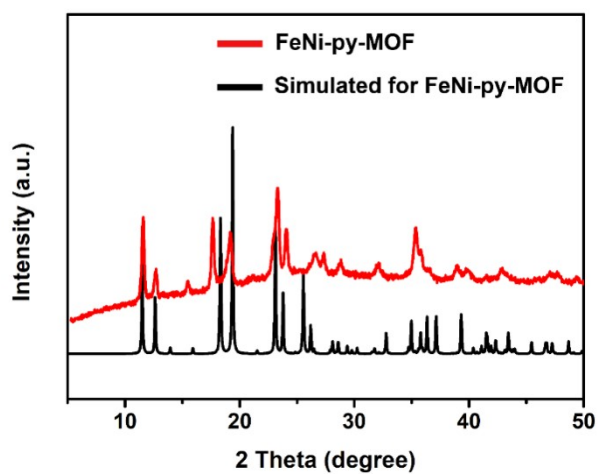

**Figure S3.** XRD pattern of FeNi-py-MOF precursor.

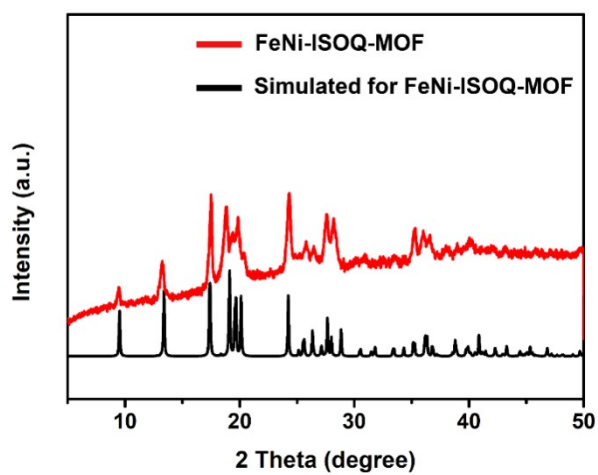

**Figure S4.** XRD pattern of FeNi-ISOQ-MOF precursor.

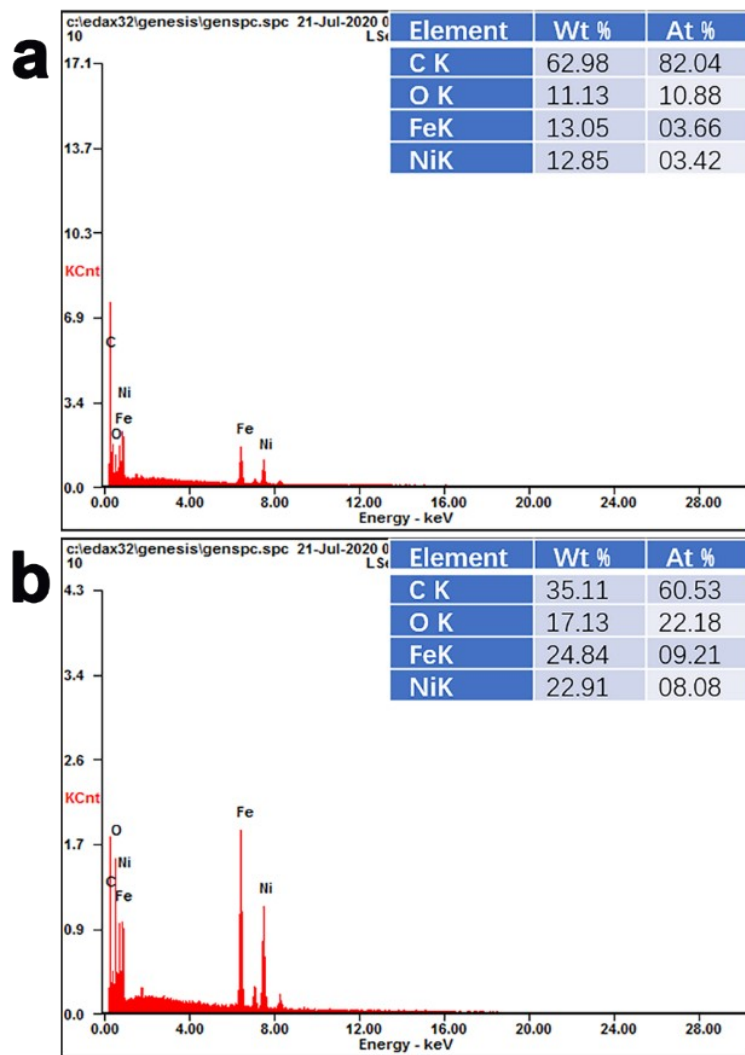

**Figure S5.** EDX patterns of (a) FeNi-py-MOF and (b) FeNi-ISOQ-MOF precursors.

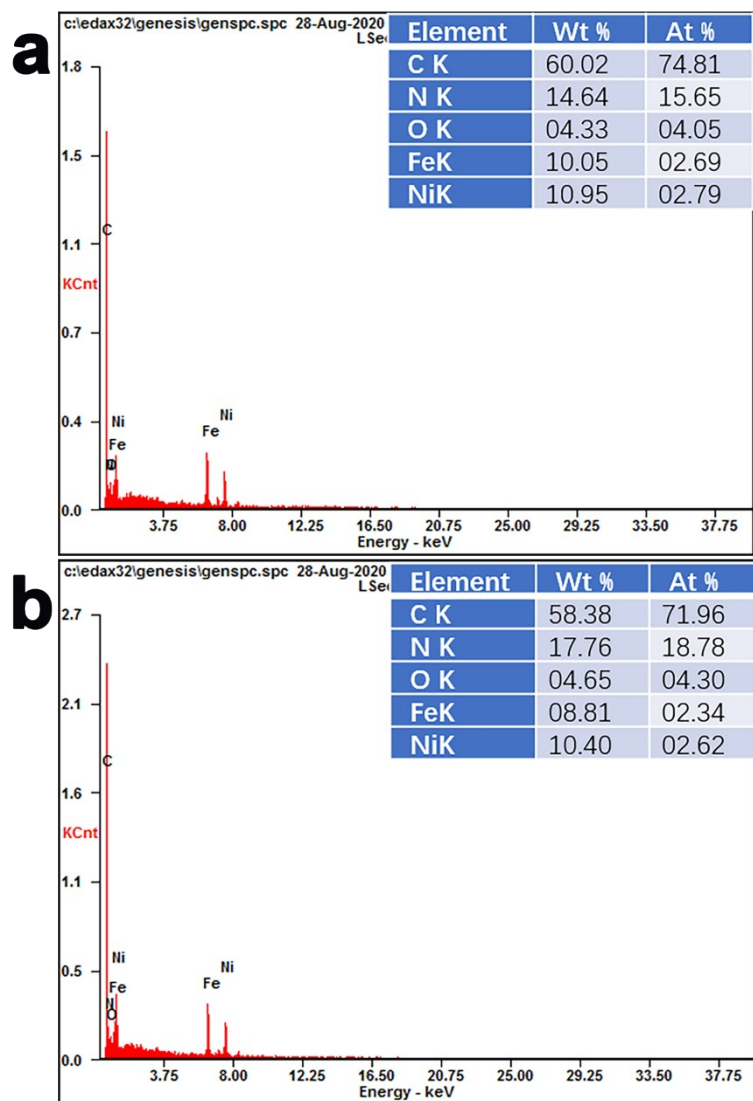

**Figure S6.** EDX patterns of (a) FeNi-py-LDH and (b) FeNi-ISOQ-LDH.

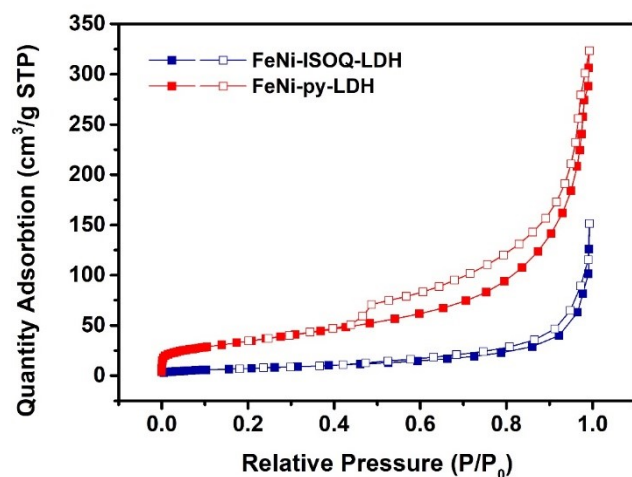

**Figure S7.** N<sub>2</sub> adsorption and desorption isotherms of FeNi-py-LDH and FeNi-ISOQ-LDH at 77 K.

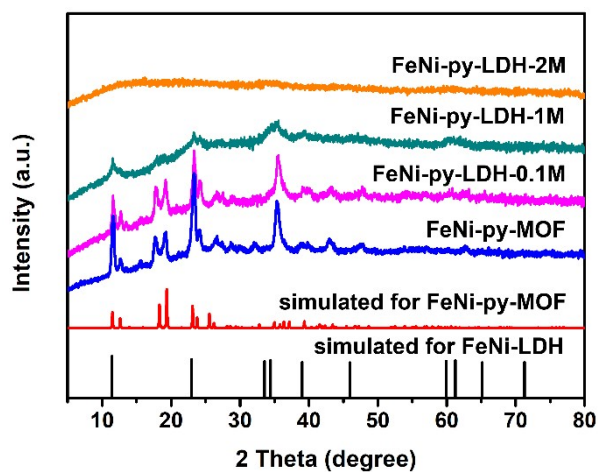

**Figure S8.** XRD patterns of FeNi-py-LDH-0.1M, FeNi-py-LDH-1M and FeNi-py-LDH-2M.

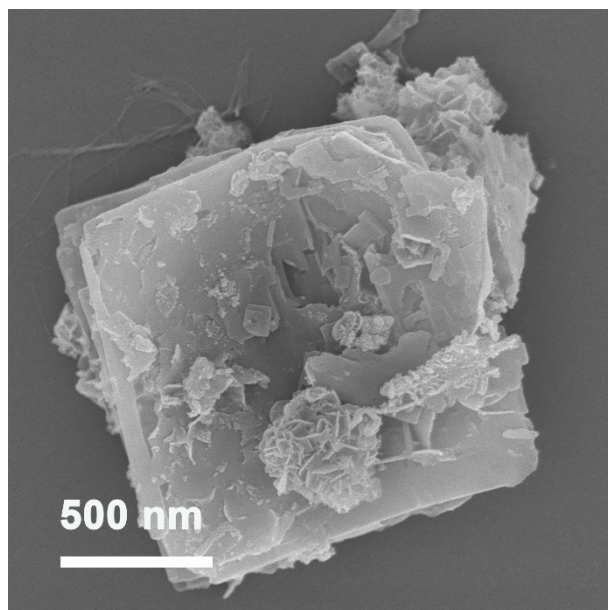

**Figure S9.** SEM image of FeNi-py-LDH-0.1M.

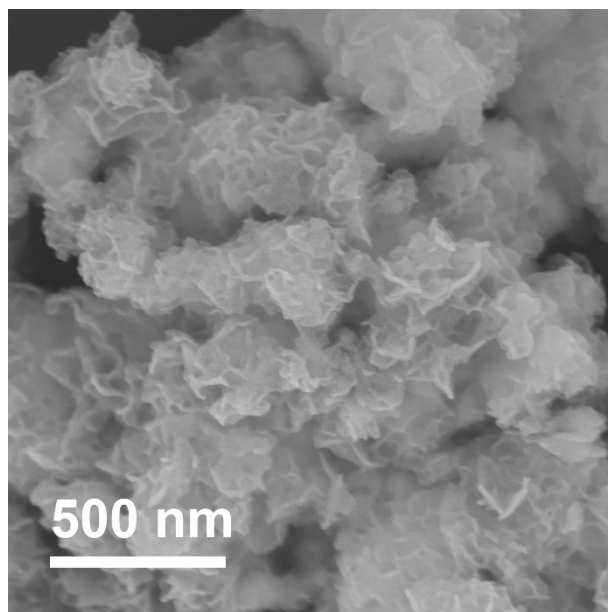

**Figure S10.** SEM image of FeNi-py-LDH-2M.

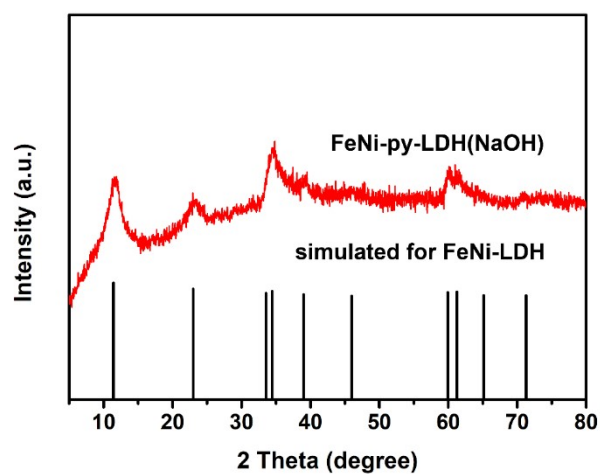

**Figure S11.** XRD patterns of FeNi-py-LDH(NaOH) and the simulated FeNi-LDH.

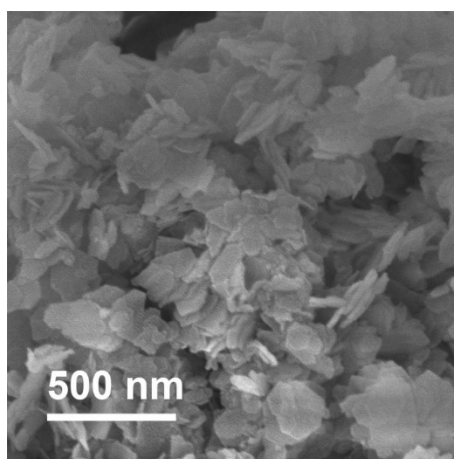

**Figure S12.** SEM image of FeNi-py-LDH(NaOH).

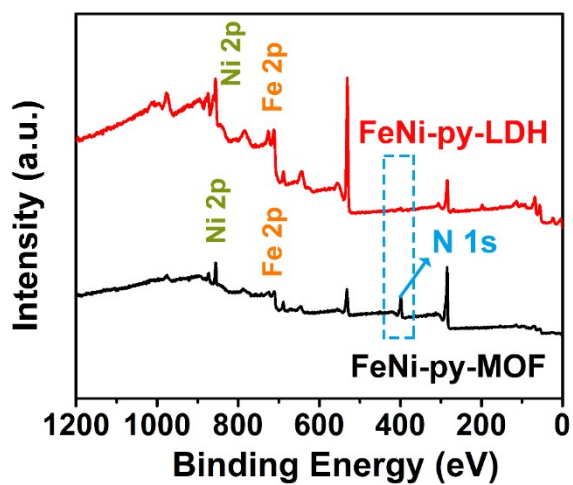

**Figure S13.** Survey XPS spectra of FeNi-py-MOF and FeNi-py-LDH.



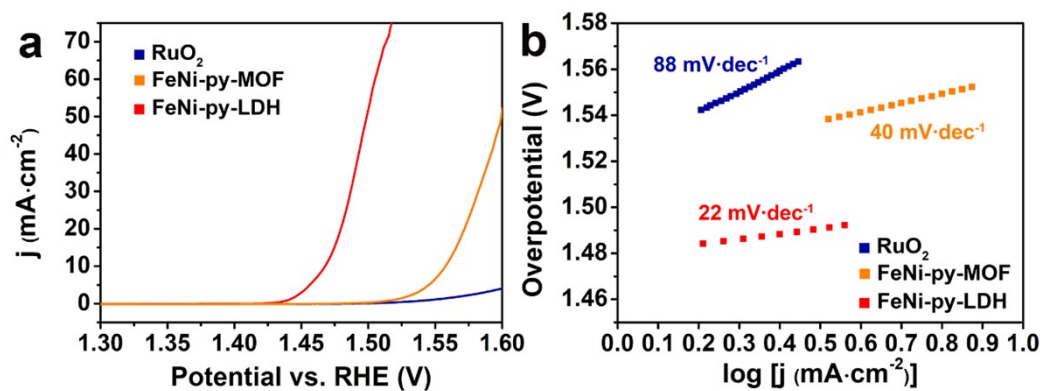

**Figure S14.** (a) The LSV curves of FeNi-py-LDH, FeNi-py-MOF and RuO<sub>2</sub>. (b) The Tafel slopes of FeNi-py-LDH, FeNi-py-MOF and RuO<sub>2</sub>.

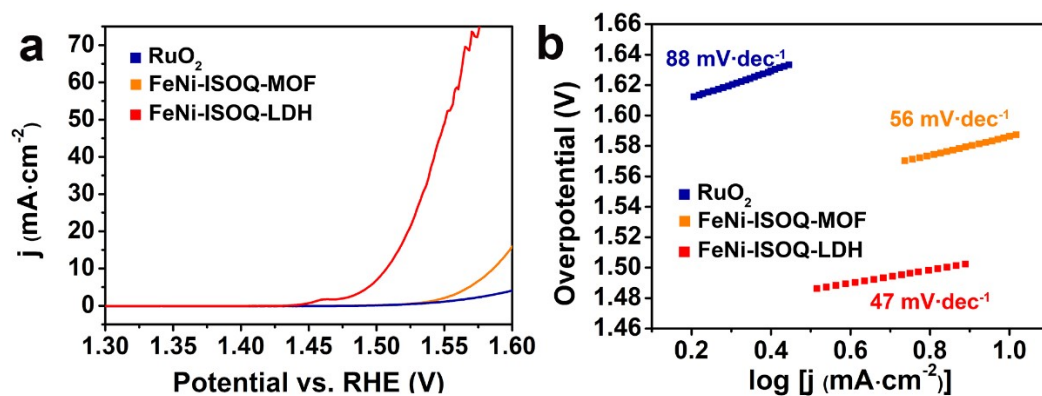

**Figure S15.** (a) The LSV curves of FeNi-ISOQ-LDH, FeNi-ISOQ-MOF and RuO<sub>2</sub>. (b) The Tafel slopes of FeNi-ISOQ-LDH, FeNi-ISOQ-MOF and RuO<sub>2</sub>.

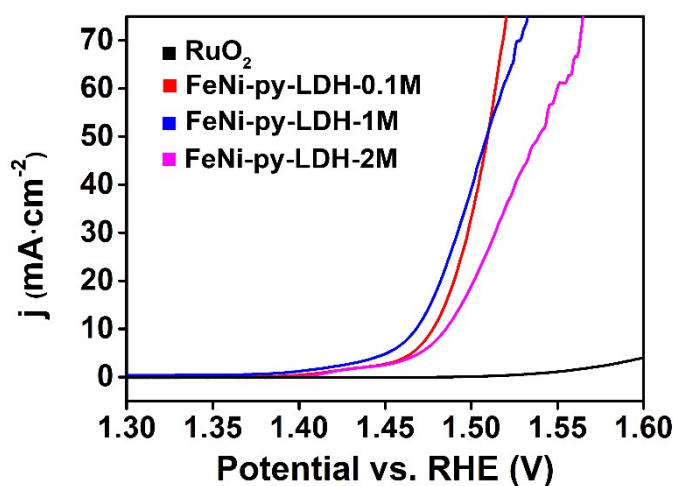

**Figure S16.** The LSV curves of FeNi-py-LDH-0.1M, FeNi-py-LDH-1M and FeNi-py-LDH-2M.

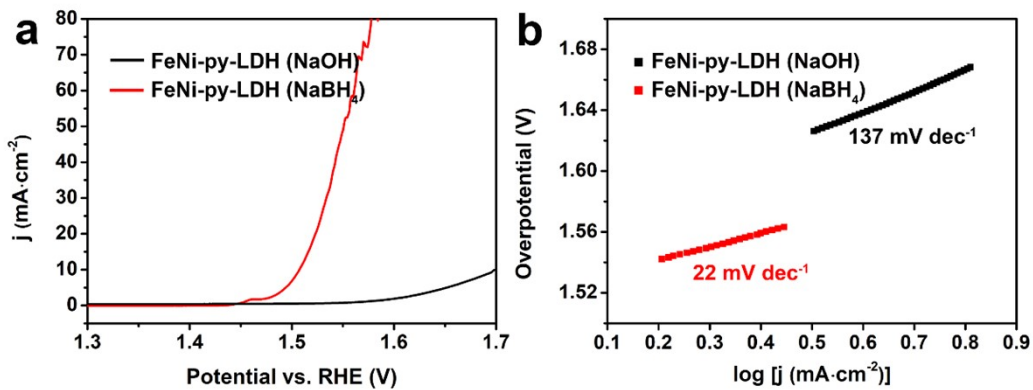

**Figure S17.** (a) The LSV curves of FeNi-py-LDH(NaOH) and FeNi-py-LDH(NaBH<sub>4</sub>). (b) The Tafel slopes of FeNi-py-LDH(NaOH) and FeNi-py-LDH(NaBH<sub>4</sub>).

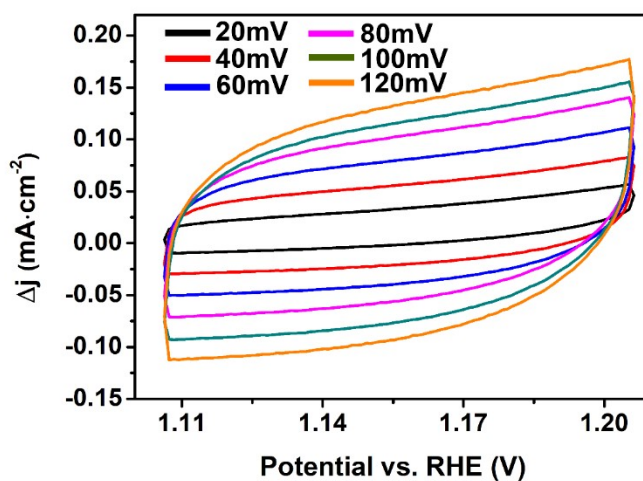

**Figure S18.** The CV curves of FeNi-py-LDH at different scan rate of 20, 40, 60, 80, 100 and 120 mV s<sup>-1</sup>.

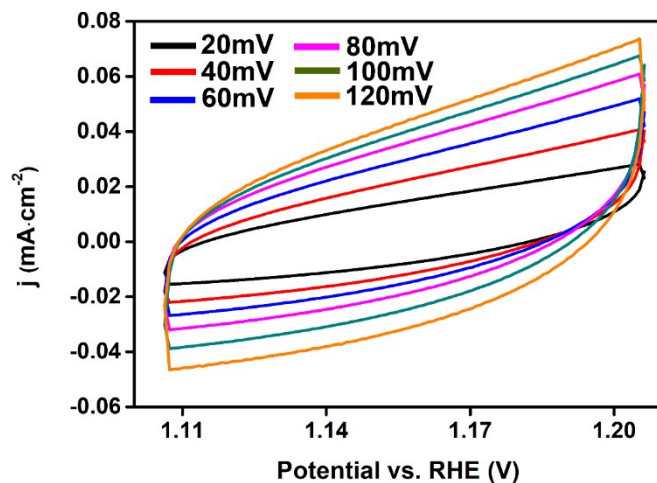

**Figure S19.** The CV curves of FeNi-ISOQ-LDH at different scan rate of 20, 40, 60, 80, 100 and 120 mV s<sup>-1</sup>.

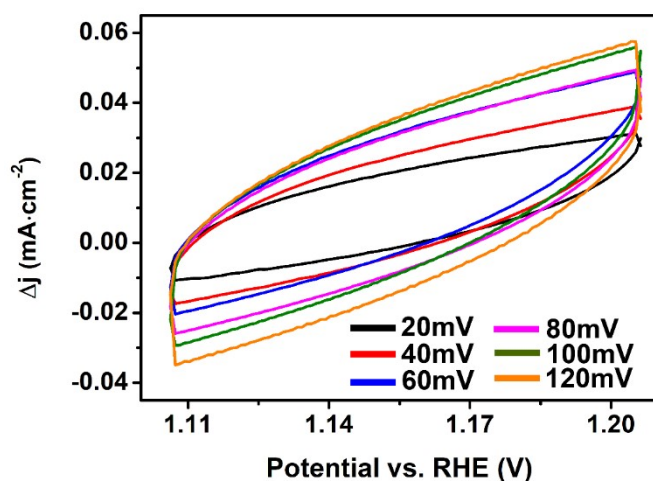

**Figure S20.** The CV curves of RuO<sub>2</sub> at different scan rate of 20, 40, 60, 80, 100 and 120 mV s<sup>-1</sup>.

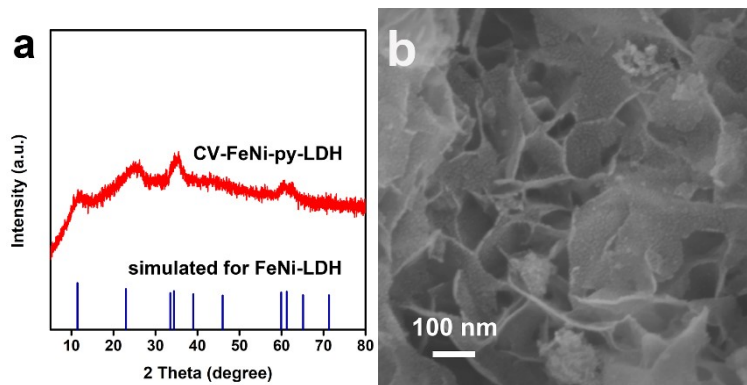

**Figure S21.** (a) XRD pattern and (b) SEM image of FeNi-py-LDH after 1000 cycles.

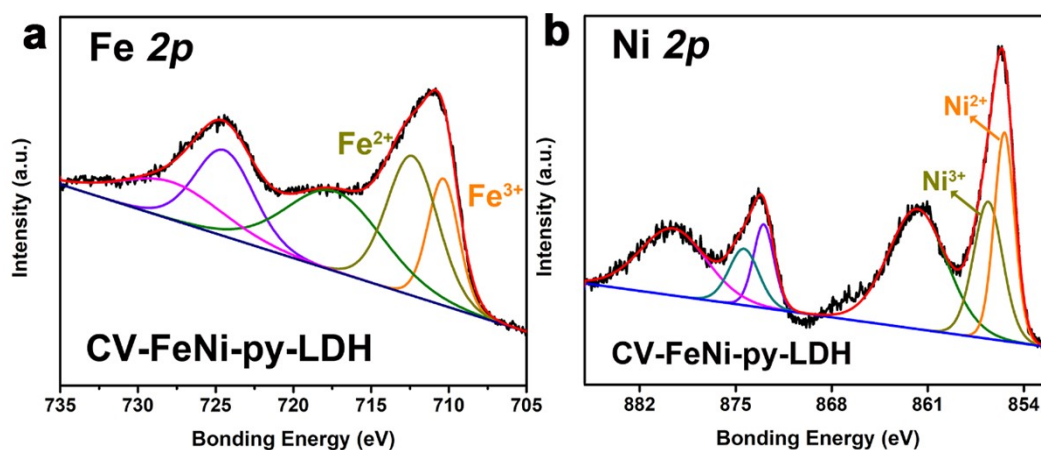

**Figure S22.** (a) Fe 2p (b) Ni 2p XPS spectra of FeNi-py-LDH after 1000 cycles.

**Table S1.** Comparison of electrocatalytic performance of OER catalysts in 1 M KOH.

| Catalysts                                   | MOFs          | Overpotential<br>at 10 mA·cm <sup>-2</sup><br>(mV) | Tafel slope<br>(mV·dec <sup>-1</sup> ) | C <sub>dl</sub><br>(mF cm <sup>-2</sup> ) | Ref.      |
|---------------------------------------------|---------------|----------------------------------------------------|----------------------------------------|-------------------------------------------|-----------|
| FeNi-py-LDH                                 | FeNi-py-MOF   | 238                                                | 22                                     | 1.9                                       | This work |
| FeNi-ISOQ-LDH                               | FeNi-ISOQ-MOF | 278                                                | 42                                     | 1.1                                       | This work |
| RuO <sub>2</sub> nanoparticles              | -             | 389                                                | 88                                     | 0.2                                       | This work |
| Co <sub>9</sub> S <sub>8</sub> @NiFe LDH    | -             | 220                                                | 52                                     | 31.8                                      | 1         |
| Ni-Fe LDH-V <sub>O</sub>                    | -             | 230                                                | 39.6                                   | -                                         | 2         |
| NiFeV-LDH                                   | -             | 241                                                | 53.7                                   | -                                         | 3         |
| Ce-Ni-Fe LDH                                | MIL-88A       | 242                                                | 34                                     | 1.46                                      | 4         |
| Ni-Fe DSNCs                                 | MIL-88B       | 246(20 mA·cm <sup>-2</sup> )                       | 71                                     | 1.46                                      | 5         |
| NiFeCo-LDH/CF                               | ZIF-67        | 249                                                | 42                                     | 0.71                                      | 6         |
| Fe-Ni@NC                                    | -             | 257                                                | 54.6                                   | 5.58                                      | 7         |
| Co <sub>8</sub> Fe <sub>1</sub> -LDH        | -             | 262                                                | 42                                     | 0.59                                      | 8         |
| Fe <sub>2</sub> O <sub>3</sub> @NiMOF-74    | Ni-MOF-74     | 264                                                | 48                                     | 3.33                                      | 9         |
| Co(OH) <sub>2</sub>                         | -             | 267                                                | 62                                     | -                                         | 10        |
| Ni-Fe-OH/Ni <sub>3</sub> S <sub>2</sub> /NF | -             | 268                                                | 54                                     | 30.6                                      | 11        |
| Fe-Ni LDH                                   | -             | 280                                                | 49.4                                   | -                                         | 12        |
| γ-FeOOH/NF-6M                               | -             | 286                                                | 51                                     | -                                         | 13        |
| NiFe-LDH/NEGF                               | -             | 290                                                | 68                                     | 7.9                                       | 14        |
| NaBH <sub>4</sub> -FeNi-LDH                 | -             | 307                                                | 48                                     | -                                         | 15        |
| FeNiPc-CP                                   | -             | 317                                                | -                                      | 95                                        | 16        |
| NCO-HNSs                                    | -             | 340                                                | 51                                     | -                                         | 17        |
| FeOOH HNTAs                                 | -             | 350                                                | 79                                     | -                                         | 18        |

|                        |   |            |            |            |    |
|------------------------|---|------------|------------|------------|----|
| <b>RuO<sub>2</sub></b> | - | <b>370</b> | -          | -          | 19 |
| <b>nanoparticles</b>   |   |            |            |            |    |
| <b>RuO<sub>2</sub></b> |   | <b>389</b> | -          | -          | 20 |
| <b>nanoparticles</b>   |   |            |            |            |    |
| <b>RuO<sub>2</sub></b> |   | <b>390</b> | -          | -          | 21 |
| <b>nanoparticles</b>   |   |            |            |            |    |
| <b>RuO<sub>2</sub></b> |   | <b>397</b> | -          | -          | 22 |
| <b>nanoparticles</b>   |   |            |            |            |    |
| <b>Beta-FeOOH</b>      | - | <b>400</b> | <b>186</b> | -          | 23 |
| <b>RuO<sub>2</sub></b> | - | <b>400</b> | -          | -          | 24 |
| <b>nanoparticles</b>   |   |            |            |            |    |
| <b>NiOOH</b>           | - | <b>453</b> | <b>189</b> | <b>3.4</b> | 25 |

## REFERENCES

- (1) Feng, X. T.; Jiao, Q. Z.; Dai, Z.; Dang, Y. L.; Suib, S. L.; Zhang, J. T.; Zhao, Y.; Li, H. S.; Feng, C. H.; Li, A. R. Revealing the effect of interfacial electron transfer in heterostructured Co<sub>9</sub>S<sub>8</sub>@NiFe LDH for enhanced electrocatalytic oxygen evolution. *J. Mater. Chem. A* **2021**, *9* (20), 12244-12254.
- (2) Zhou, Y.; Zhang, W.; Hu, J.; Li, D.; Yin, X.; Gao, Q. Inherent Oxygen Vacancies Boost Surface Reconstruction of Ultrathin Ni-Fe Layered-Double-Hydroxides toward Efficient Electrocatalytic Oxygen Evolution. *ACS Sustain. Chem. Eng.* **2021**, *9* (21), 7390-7399.
- (3) Zhou, L.; Zhang, C.; Zhang, Y.; Li, Z.; Shao, M. Host Modification of Layered Double Hydroxide Electrocatalyst to Boost the Thermodynamic and Kinetic Activity of Oxygen Evolution Reaction. *Adv. Funct. Mater.* **2021**, *31* (15), 2009743-2009753.
- (4) Xu, H. J.; Shan, C. F.; Wu, X. X.; Sun, M. Z.; Huang, B. L.; Tang, Y.; Yan, C. H. Fabrication of layered double hydroxide microcapsules mediated by cerium doping in metal-organic frameworks for boosting water splitting. *Energy Environ. Sci.* **2020**, *13* (9), 2949-2956.
- (5) Zhang, J.; Yu, L.; Chen, Y.; Lu, X. F.; Gao, S.; Lou, X. W. Designed Formation of Double-Shelled Ni-Fe Layered-Double-Hydroxide Nanocages for Efficient Oxygen Evolution Reaction. *Adv. Mater.* **2020**, *32* (16), 1906432-1906438.
- (6) Lin, Y.; Wang, H.; Peng, C.; Bu, L.; Chiang, C.; Tian, K.; Zhao, Y.; Zhao, J.; Lin, Y.; Lee, J.; Gao, L. Co-Induced Electronic Optimization of Hierarchical NiFe LDH for Oxygen Evolution. *Small* **2020**, *16* (38), 2002426-2002435.
- (7) Wang, Q. Q.; Song, Y. Y.; Sun, D. S.; Zhang, L. X. MOF-Derived Fe-Doped Ni@NC Hierarchical Hollow Microspheres as an Efficient Electrocatalyst for Alkaline Oxygen Evolution Reaction. *Acs Omega* **2021**, *6* (16), 11077-11082.
- (8) Zhao, J.; Wang, X. R.; Chen, F. W.; He, C.; Wang, X. J.; Li, Y. P.; Liu, R. H.; Chen, X. M.; Hao, Y. J.; Yang, M.; Li, F. T. A one-step synthesis of hierarchical porous CoFe-layered double hydroxide nanosheets with optimized composition for enhanced oxygen evolution electrocatalysis. *Inorg. Chem. Front.* **2020**, *7* (3), 737-745.
- (9) Gao, Z.; Yu, Z. W.; Liu, F. Q.; Yu, Y.; Su, X. M.; Wang, L.; Xu, Z. Z.; Yang, Y. L.; Wu, G. R.; Feng, X. F.; Luo, F. Ultralow-Content Iron-Decorated Ni-MOF-74 Fabricated by a Metal-Organic

Framework Surface Reaction for Efficient Electrocatalytic Water Oxidation. *Inorganic Chemistry* **2019**, *58* (17), 11500-11507.

(10) Liu, W.; Yin, R.; Shi, W.; Xu, X.; Shen, X.; Yin, Q.; Xu, L.; Cao, X. Gram-Scale Preparation of 2D Transition Metal Hydroxide/Oxide Assembled Structures for Oxygen Evolution and Zn-Air Battery. *ACS Appl. Energy Mater.* **2019**, *2* (1), 579-586.

(11) He, W. J.; Ren, G.; Li, Y.; Jia, D. B.; Li, S. Y.; Cheng, J. N.; Liu, C. C.; Hao, Q. Y.; Zhang, J.; Liu, H. Amorphous nickel-iron hydroxide films on nickel sulfide nanoparticles for the oxygen evolution reaction. *Catal. Sci. Technol.* **2020**, *10* (6), 1708-1713.

(12) Yu, L.; Yang, J. F.; Guan, B. Y.; Lu, Y.; Lou, X. W. Hierarchical Hollow Nanoprisms Based on Ultrathin Ni-Fe Layered Double Hydroxide Nanosheets with Enhanced Electrocatalytic Activity towards Oxygen Evolution. *Angew. Chem. Int. Ed.* **2018**, *57* (1), 172-176.

(13) Wang, K.; Du, H.; He, S.; Liu, L.; Yang, K.; Sun, J.; Liu, Y.; Du, Z.; Xie, L.; Ai, W.; Huang, W. Kinetically Controlled, Scalable Synthesis of  $\gamma$ -FeOOH Nanosheet Arrays on Nickel Foam toward Efficient Oxygen Evolution: The Key Role of In-Situ-Generated  $\gamma$ -NiOOH. *Adv. Mater.* **2021**, *33* (11), 2005587-2005596.

(14) Manna, N.; Ayasha, N.; Singh, S. K.; Kurungot, S. A NiFe layered double hydroxide-decorated N-doped entangled-graphene framework: a robust water oxidation electrocatalyst. *Nanoscale Adv.* **2020**, *2* (4), 1709-1717.

(15) Wang, Y. Q.; Tao, S.; Lin, H.; Han, S. B.; Zhong, W. H.; Xie, Y. S.; Hu, J.; Yang, S. H. NaBH<sub>4</sub> induces a high ratio of Ni<sup>3+</sup>/Ni<sup>2+</sup> boosting OER activity of the NiFe LDH electrocatalyst. *RSC Adv.* **2020**, *10* (55), 33475-33482.

(16) Qi, D.; Chen, X.; Liu, W.; Liu, C.; Liu, W.; Wang, K.; Jiang, J. A Ni/Fe-based heterometallic phthalocyanine conjugated polymer for the oxygen evolution reaction. *Inorg. Chem. Front.* **2020**, *7* (3), 642-646.

(17) Wang, H.; Hsu, Y.; Chen, R.; Chan, T.; Chen, H.; Liu, B. Ni<sup>3+</sup>-Induced Formation of Active NiOOH on the Spinel Ni-Co Oxide Surface for Efficient Oxygen Evolution Reaction. *Adv. Energy Mater.* **2015**, *5* (10), 1500091-1500098.

(18) Feng, J.; Xu, H.; Dong, Y.; Ye, S.; Tong, Y.; Li, G. FeOOH/Co/FeOOH Hybrid Nanotube Arrays as High-Performance Electrocatalysts for the Oxygen Evolution Reaction. *Angew. Chem. Int. Ed.* **2016**, *55* (11), 3694-3698.

(19) Xu, X.; Zhong, Z.; Yan, X.; Kang, L.; Yao, J. Cobalt layered double hydroxide nanosheets synthesized in water-methanol solution as oxygen evolution electrocatalysts. *J. Mater. Chem. A* **2018**, *6* (14), 5999-6006.

(20) Han, X.; Yu, C.; Zhou, S.; Zhao, C.; Huang, H.; Yang, J.; Liu, Z.; Zhao, J.; Qiu, J. Ultrasensitive Iron-Triggered Nanosized Fe-CoOOH Integrated with Graphene for Highly Efficient Oxygen Evolution. *Adv. Energy Mater.* **2017**, *7* (14), 1602148-1602156.

(21) Zhang, J.; Zhang, M.; Qiu, L.; Zeng, Y.; Chen, J.; Zhu, C.; Yu, Y.; Zhu, Z. Three-dimensional interconnected core-shell networks with Ni(Fe)OOH and M-N-C active species together as high-efficiency oxygen catalysts for rechargeable Zn-air batteries. *J. Mater. Chem. A* **2019**, *7* (32), 19045-19059.

(22) Zou, H.; He, B.; Kuang, P.; Yu, J.; Fan, K. Metal-Organic Framework-Derived Nickel-Cobalt Sulfide on Ultrathin Mxene Nanosheets for Electrocatalytic Oxygen Evolution. *ACS Appl. Mater. Interfaces* **2018**, *10* (26), 22311-22319.

(23) Liang, Y.; Yu, Y.; Huang, Y.; Shi, Y.; Zhang, B. Adjusting the electronic structure by Ni

incorporation: a generalized in situ electrochemical strategy to enhance water oxidation activity of oxyhydroxides. *J. Mater. Chem. A* **2017**, *5* (26), 13336-13340.

(24) Li, P.; Wang, M.; Duan, X.; Zheng, L.; Cheng, X.; Zhang, Y.; Kuang, Y.; Li, Y.; Ma, Q.; Feng, Z.; Liu, W.; Sun, X. Boosting oxygen evolution of single-atomic ruthenium through electronic coupling with cobalt-iron layered double hydroxides. *Nat. Commun.* **2019**, *10* (1), 1711-1721.

(25) Huang, L.; He, Z.; Guo, J.; Pei, S.; Shao, H.; Wang, J. Photodeposition fabrication of hierarchical layered Co-doped Ni oxyhydroxide ( $\text{Ni}_x\text{Co}_{1-x}\text{OOH}$ ) catalysts with enhanced electrocatalytic performance for oxygen evolution reaction. *Nano Res.* **2020**, *13* (1), 246-254.
